# Supplementary material
Source: publisher figshare collection journal article supplement (https://sage.figshare.com/ndownloader/files/17797589)
Supplement: Supplementary file 1 [file 17797589]

## **Supplemental Material**

**Table 1.** Participant Responses to Sexual Health Questions.

|                                               | <u>% (n)</u>                                      |
|-----------------------------------------------|---------------------------------------------------|
| Condom Used at Last Intercourse               | 56.8% ( <i>n</i> = 141)                           |
| Condom Always Used with partner               | 42.1% ( <i>n</i> = 85)                            |
| Condoms Never used with partner               | 20.8% ( <i>n</i> = 42)                            |
| Inconsistent Condom Use                       | 45% ( <i>n</i> = 111)                             |
| Condoms used for STI protection only          | 2.8% ( <i>n</i> = 6 )                             |
| Condoms used for pregnancy prevention only    | 28.6% ( <i>n</i> = 61 )                           |
| Condoms used for STI and pregnancy protection | 42.7% ( <i>n</i> = 91 )                           |
| Extra-dyadic sexual intercourse               | 7.3% ( <i>n</i> = 18)                             |
| Has Never Tested Self for HIV                 | 74.9% ( <i>n</i> = 185 )                          |
| Has Never Tested Self for STIs                | 62.5% ( <i>n</i> = 155 )                          |
| Lifetime Number of Sex Partners               | <u>Men</u><br><i>M</i> = 5.0 ( <i>SD</i> = 6.7)   |
|                                               | <u>Women</u><br><i>M</i> = 3.5 ( <i>SD</i> = 4.8) |

**Table 2.** Variance-Covariance Matrix of Variables in Model-Comparison Analyses.

|              | 1    | 2    | 3     | 4     | 5    | 6    | 7     | 8     | 9     | 10   |
|--------------|------|------|-------|-------|------|------|-------|-------|-------|------|
| 1. ATT_M     | .178 |      |       |       |      |      |       |       |       |      |
| 2. ATT_F     | .099 | .189 |       |       |      |      |       |       |       |      |
| 3. SN_M      | .279 | .267 | 2.423 |       |      |      |       |       |       |      |
| 4. SN_F      | .258 | .287 | .792  | 1.830 |      |      |       |       |       |      |
| 5. PBC_M     | .070 | .059 | .164  | .125  | .121 |      |       |       |       |      |
| 6. PBC_F     | .044 | .038 | .050  | .135  | .029 | .107 |       |       |       |      |
| 7. DURATION  | .062 | .036 | .057  | .000  | .080 | .021 | 1.639 |       |       |      |
| 8. BI_M      | .565 | .569 | 1.462 | 1.627 | .268 | .187 | .232  | 4.651 |       |      |
| 9. BI_F      | .570 | .700 | 1.222 | 1.723 | .298 | .266 | .280  | 3.559 | 5.469 |      |
| 10. BEHAVIOR | .201 | .217 | .407  | .621  | .110 | .090 | .137  | 1.187 | 1.415 | .726 |

*Note.* ATT\_M = Male Attitude, ATT\_F = Female Attitude, SN\_M = Male Subjective Norm, SN\_F = Female Subjective Norm, DURATION = Relationship Duration, BI\_M = Male Behavioral Intention, BI\_F = Female Behavioral Intention, BEHAVIOR = Condom-use Consistency.

**Table 3.** Tests of Sex Differences for Condom-Use Variables.

|                                         | Means (SDs)   |               | <i>t</i> ( <i>df</i> = 123) |
|-----------------------------------------|---------------|---------------|-----------------------------|
|                                         | Men           | Women         |                             |
| Condom-use Attitude <sup>a</sup>        | 4.88 (1.46)   | 5.16 (1.46)   | 2.38*                       |
| Condom-use Subjective Norm <sup>b</sup> | 28.86 (10.90) | 33.01 (10.13) | 4.08**                      |
| Perceived Behavioral Control            | 5.13 (1.20)   | 5.71 (1.00)   | 4.85**                      |
| Condom-use Intention <sup>c</sup>       | 4.29 (2.16)   | 4.52 (2.34)   | 1.5                         |

<sup>a</sup> Scores ranged from 1 to 7; higher scores indicate more positive attitudes toward using condoms.

<sup>b</sup> Scores ranged from 1 to 49; higher scores indicate greater perceived support for using condoms during sex.

<sup>c</sup> Scores ranged from 1 to 7; higher scores indicate more positive intentions to use condoms during sex.

\*  $p < .05$ , \*\*  $p < .01$

**Table 4.** Correlations among Condom-Use Predictor and Outcome Variables.

|                                 | 1.            | 2.            | 3.            | 4.            | 5.            | 6.            |
|---------------------------------|---------------|---------------|---------------|---------------|---------------|---------------|
| 1. Condom-use Attitude          | <b>.540**</b> | .488**        | .282**        | -.064         | .688**        | .586**        |
| 2. Condom-use Subjective Norm   | .424**        | <b>.376**</b> | .268**        | .000          | .545**        | .538**        |
| 3. Perceived Behavioral Control | .447**        | .295**        | <b>.306**</b> | -.097         | .347**        | .288**        |
| 4. Relationship Duration        | -.115         | -.029         | -.186*        | <b>.921**</b> | -.093         | -.126         |
| 5. Behavioral Intention         | .621**        | .435**        | .364**        | -.084         | <b>.706**</b> | .710**        |
| 6. Condom-use Consistency       | .559**        | .307**        | .391**        | -.126         | .646**        | <b>.890**</b> |

Note: Correlations for men appear below the diagonal; correlations for women appear above the diagonal. Correlations along the diagonal are between dyad members.

\*  $p < .05$ , \*\*  $p < .01$

**Table 5.** Unstandardized (SE in Parentheses) and Standardized Parameters for Actor-Partner Dyadic Model of TPB.

| Parameter Estimate             | Unstandardized | Standardized | <i>p</i> |
|--------------------------------|----------------|--------------|----------|
| Attitude Actor Effect          |                |              |          |
| a. Male Attitude               | 1.630 (.372)   | .318         | .000     |
| b. Female Attitude             | 2.477 (.355)   | .463         | .000     |
| Subjective Norm Actor Effect   |                |              |          |
| c. Male Subjective Norm        | .221 (.074)    | .160         | .004     |
| d. Female Subjective Norm      | .221 (.074)    | .129         | .004     |
| PBC Actor Effect               |                |              |          |
| e. Male PBC                    | -.016 (.414)   | -.003        | .970     |
| f. Female PBC                  | .755 (.424)    | .106         | .078     |
| Attitude Partner Effect        |                |              |          |
| g. Male Attitude               | 1.306 (.274)   | .237         | .000     |
| h. Female Attitude             | 1.306 (.274)   | .263         | .000     |
| Subjective Norm Partner Effect |                |              |          |
| i. Male Subjective Norm        | .009 (.094)    | .006         | .923     |
| j. Female Subjective Norm      | .323 (.107)    | .203         | .003     |
| PBC Partner Effect             |                |              |          |
| k. Male PBC                    | .092 (.309)    | .014         | .767     |
| l. Female PBC                  | .092 (.309)    | .014         | .767     |
| Intention → Behavior           |                |              |          |
| m. Male Intention              | .139 (.014)    | .353         | .000     |
| n. Female Intention            | .139 (.014)    | .380         | .000     |

PBC → Behavior

|             |             |      |      |
|-------------|-------------|------|------|
| o. Male PBC | .205 (.108) | .084 | .061 |
|-------------|-------------|------|------|

|               |             |      |      |
|---------------|-------------|------|------|
| p. Female PBC | .205 (.108) | .079 | .061 |
|---------------|-------------|------|------|

---
